# Supplementary material for: Adult-born granule cells mature through two functionally distinct states
Source: eLife. 2014 Jul 24;3:e03104. doi: 10.7554/eLife.03104 (PMC4131194; doi:10.7554/eLife.03104)
Supplement: Supplementary file 1. — Measured parameters from individual ABGCs—Brunner Neubrandt data ABGC.xlsx. DOI: http://dx.doi.org/10.7554/eLife.03104.009 [file elife03104s001.xlsx]

## Sheet: dpi20
bjd0724c2b
bjd0723c1		dpi20				SUMMARY								INDIVIDUAL CELLS >		INDIVIDUAL CELLS >
bjd0724c1b
nm0231c23	N=	9															85.7028	150	150	200	200	200	250														76.1894	100	150	150	200	200	250
nm0231c3		average	sem		5	10	20	40	60	80						bjd0724c2b		5	10	20	40	60	80			5	10	20	40	60	80		average			bjd0723c1		5	10	20	40	60	80			5	10	20	40
nm0231c21	Rin	377.824	19.9978													Rin	344.983	0	0	0	0	0	0													Rin	327.612	6.5	9.5	14.5	20	29.5	25.5
bjd0724c1	Mtau	31.8306	1.63195									VAR	1.89681	0.287261		Mtau	33.91								VAR	1.98095	1.02667	1.72722	1.77308	2.28929	2.2691		1.84438			Mtau	25.658								VAR	0.525758	0.951111	1.42278	1.54682
nm0230c22	max AP	36.4444	3.32963	current	average firing frequency											max AP	34																			max AP	33
szj628c2				50	0	0	0	#DIV/0!	0	0								0	0	0	0	0	0															0	0	0	0	0	0
	RMP	-76.1971	1.35644	100	3.5	3.77778	2.71429	#DIV/0!	2.42857	2.5		ASL	2.34921	0.118019		RMP	-79.7021	2	0	0	0	0	0		ASL	3.70548	3.68932	1.9901	1.26491	1.90422	1.96277		2.41947			RMP	-79.6344	2.5	1.5	2	0	0.5	0		ASL	2.04973	1.83412	1.85594	1.35116
	tested MP	-75.5527	2.34215	150	11.0714	15.1667	14.2143	#DIV/0!	19.5	17.6875						tested MP	-80.01	13	9	8	10.5	8	8.5													tested MP	-75.5644	9	10	16.5	14.5	22.5	9
				200	18.8571	24.5556	26.0714	#DIV/0!	41.5714	38.25								22.5	24.5	23	36	38	34.5															13.5	19.5	22.5	33.5	52	30.5
	Rin VC	346.47	20.0238	250	25.3571	31.2222	35.3571	#DIV/0!	54.5714	58.375		OFFSET	73.0171	4.22066		Rin VC	472.451	29	35	38	39	57	70.5		OFFSET	100.311	84.3512	94.5742	79.5271	71.8608	83.5925		85.7028			Rin VC	278.247	18.5	24.5	35	39.5	60	52.5		OFFSET	66.874	84.3512	70.9306	79.5271
				300	28	33.2778	43.0714	#DIV/0!	55.5	71.625								27	33.5	41	45	59	78															21.5	29	40	40	60	69.5
	very first AP			350	27.0714	33.1111	46.2143	#DIV/0!	55	73.9375						very first AP		26	32.5	44.5	46.5	59	79													very first AP		23	26	40.5	41	60	79.5
	max dv/dt (no filter)	585.436	22.2053	400	25.5	31.7222	46.7143	#DIV/0!	55.7143	74.4375						max dv/dt (no filter)	726.829	24.5	29.5	44.5	53	60	79													max dv/dt (no filter)	614.634	24	27	41	45	60	80
	threshold	-34.513	1.00504	450	24.1429	29.6111	46.4286	#DIV/0!	56.1429	74.9375						threshold	-29.269	23	29.5	44	53.5	60	79.5													threshold	-33.379	26	26	39.5	47.5	61	80
	AP width	0.503778	0.0154711	500	22.1429	28.2222	43.2857	#DIV/0!	56.3571	74.875						AP width	0.453	20.5	27.5	38	54	61	80													AP width	0.525	25.5	24.5	37.5	47.5	61.5	80
				550	20.7857	26.3333	41.2143	#DIV/0!	57.0714	74.625							0.299	20	25.5	37.5	51	61	80															23	24	34	48.5	62	80
				600	19.3571	24.9444	37.5714	#DIV/0!	56.8571	74.6875							0.68	19	24.5	34.5	50.5	61	80															20.5	23.5	31	47.5	62	80.5
				650	18	24	36.1429	#DIV/0!	57.5714	75.25								17	24	33	49.5	62	80															19	23	30.5	47	62	81
				700	17.5714	22.6111	33.8571	#DIV/0!	56.7857	75								17	22.5	31.5	49.5	62.5	80.5															18	22.5	29	47	62	81
				750	16.2857	21.1111	33.1429	#DIV/0!	56.4286	75.25								16	21.5	30	48.5	62.5	80.5															17	21	28	46	62	81
												current						5	10	20	40	60	80			5	10	20	40	60	80							5	10	20	40	60	80			5	10	20	40
												50		spike count				0	0	0	0	0	0		50	x	x	x	x	x	x							0	0	0	0	0	0		50	x	x	x	x
												100						4	0	0	0	0	0		100	4	x	x	x	x	x							0	1	0	0	1	0		100	x	1	x	x
												150					-80.1123	15	9	5	13	9	7		150	15	9	5	13	9	7						-77.0438	8	10	13	8	22	3		150	8	10	13	8
												200						26	25	22	36	35	35		200	26	25	22	36	35	35							13	19	20	27	47	20		200	13	19	20	27
												250						30	37	38	39	56	69		250	30	37	38	39	56	69							18	24	30	39	60	36		250	18	24	30	39
												300						29	35	41	50	59	77		300	29	35	41	50	59	77							22	29	40	40	60	59		300	22	29	40	40
												350						28	35	46	52	59	79		350	28	35	46	52	59	79							26	28	40	41	60	79		350	26	28	40	41
												400						26	32	46	62	60	79		400	26	32	46	62	60	79							28	28	42	45	60	80		400	28	28	42	45
												450						25	31	46	60	60	79		450	25	31	46	60	60	79							34	27	43	49	61	80		450	34	27	43	49
												500						22	29	39	58	61	80		500	22	29	39	58	61	80							34	25	40	49	61	80		500	34	25	40	49
												550						21	26	39	55	61	80		550	21	26	39	55	61	80							29	25	38	52	62	80		550	29	25	38	52
												600						20	25	36	54	61	80		600	20	25	36	54	61	80							26	24	33	50	62	80		600	26	24	33	50
												650						18	25	34	53	62	80		650	18	25	34	53	62	80							24	23	33	49	62	81		650	24	23	33	49
												700						19	23	32	53	63	81		700	19	23	32	53	63	81							22	23	32	50	62	81		700	22	23	32
												750						17	23	31	52	63	81		750	17	23	31	52	63	81							20	21	30	48	62	81		750	20	21
												current						5	10	20	40	60	80			5	10	20	40	60	80							5	10	20	40	60	80			5	10	20	40
												50						0	0	0	0	0	0			x	x	x	x	x	x							0	0	0	0	0	0			x	x	x	x
												100						0	0	0	0	0	0			x	x	x	x	x	x							5	2	4	0	0	0			5	2	4	x
												150					-79.9077	11	9	11	8	7	10			11	9	11	8	7	10						-74.085	10	10	20	21	23	15			10	10	20	21
												200						19	24	24	36	41	34			19	24	24	36	41	34							14	20	25	40	57	41			14	20	25	40
												250						28	33	38	39	58	72			28	33	38	39	58	72							19	25	40	40	60	69			19	25	40	40
												300						25	32	41	40	59	79			25	32	41	40	59	79							21	29	40	40	60	80			21	29	40	40
												350						24	30	43	41	59	79			24	30	43	41	59	79							20	24	41	41	60	80			20	24	41	41
												400						23	27	43	44	60	79			23	27	43	44	60	79							20	26	40	45	60	80			20	26	40	45
												450						21	28	42	47	60	80			21	28	42	47	60	80							18	25	36	46	61	80			18	25	36	46
												500						19	26	37	50	61	80			19	26	37	50	61	80							17	24	35	46	62	80			17	24	35	46
												550						19	25	36	47	61	80			19	25	36	47	61	80							17	23	30	45	62	80			17	23	30	45
												600						18	24	33	47	61	80			18	24	33	47	61	80							15	23	29	45	62	81			15	23	29	45
												650						16	23	32	46	62	80			16	23	32	46	62	80							14	23	28	45	62	81			14	23	28	45
												700						15	22	31	46	62	80			15	22	31	46	62	80							14	22	26	44	62	81			14	22	26	44
												750						15	20	29	45	62	80			15	20	29	45	62	80							14	21	26	44	62	81			14	21	26	44
														1st derivative of spike count												4													1			1					1
																										11	9	5	13	9	7							8	9	13	8	21	3			8	9	13	8
																										11	16	17	23	26	28							5	9	7	19	25	17			5	9	7	19
																										4	12	16	3	21	34							5	5	10	12	13	16			5	5	10	12
																												3	11	3	8							4	5	10	1	0	23			4	5	10	1
																												5	2		2							4	-1	0	1	0	20			4			1
																													10									2	0	2	4	0	1			2		2	4
																																						6	-1	1	4	1	0			6			4
																																						0	-2	-3	0	0	0
																																						-5	0	-2	3	1	0
																																						-3	-1	-5	-2	0	0
																																						-2	-1	0	-1	0	1
																																						-2	0	-1	1	0	0
																																						-2	-2	-2	-2	0	0
																																						5	2	4						5	2	4
																										11	9	11	8	7	10							5	8	16	21	23	15			5	8	16	21
																										8	15	13	28	34	24							4	10	5	19	34	26			4	10	5	19
																										9	9	14	3	17	38							5	5	15	0	3	28			5	5	15
																												3	1	1	7							2	4	0	0	0	11			2	4
																												2	1									-1	-5	1	1	0	0					1
																													3									0	2	-1	4	0	0						4
																													3									-2	-1	-4	1	1	0						1
																													3									-1	-1	-1	0	1	0
																																						0	-1	-5	-1	0	0
																																						-2	0	-1	0	0	1
																																						-1	0	-1	0	0	0
																																						0	-1	-2	-1	0	0
																																						0	-1	0	0	0	0
[truncated: 101 more columns]

## Sheet: dpi26
nm296c33
nm296c32		dpi26				SUMMARY								INDIVIDUAL CELLS >		INDIVIDUAL CELLS >
nm297c33
bjd0774c1b	N=	8															65.7226	100	100	150	200	150	200														62.409	100	100	150	150	150	200
bjd0774c2		average	sem		5	10	20	40	60	80						nm296c33		5	10	20	40	60	80			5	10	20	40	60	80		average			nm296c32		5	10	20	40	60	80			5	10	20	40
bjd774c2b	Rin	358.077	12.8721													Rin	321.382	11	15	17	18	32.5	32													Rin	369.948	9.5	14	18	26.5	40.5	35.5
bjd774c2c	Mtau	34.6052	1.81927									VAR	1.86106	0.155799		Mtau	42.87								VAR	1.13818	1.82426	1.22353	1.04286	2.39111	1.53192		1.52531			Mtau	34.53								VAR	1.21111	2.15	1.20056	2.09636
bjd0774c2d	max AP	64.4286	4.79015	current	average firing frequency											max AP	58																			max AP	39
0				50	0	0	0	0	0	0								0	0	0	0	0	0															0	0	0	0	0	0
	RMP	-80.9847	1.57304	100	2.625	1.92857	1.14286	1.1875	1.85714	0.666667		ASL	2.4157	0.0820836		RMP	-74.3999	4	5	6	0	2	4		ASL	2.64263	2.41821	2.07823	1.58114	2.53896	2.19414		2.24222			RMP	-79.4283	4	6	2	4	3	0		ASL	2.90689	2.84605	2.52676	1.95486
	tested MP			150	11.6875	15.7143	16.0714	17.0625	24.6429	18.75						tested MP	#DIV/0!	11	19.5	21	11	31.5	25.5													tested MP		13	19	20	26.5	31.5	28
				200	19.6875	27.2143	29.3571	33.5625	45.1429	48.1667								19	31	33	23	52.5	53															22	30.5	32.5	39	50.5	60.5
	Rin VC	257.639	32.8987	250	28.5	36.1429	42.6429	43.125	55.3571	71.3333		OFFSET	73.1144	3.27027		Rin VC	187.63	26	38	41.5	39	59	73.5		OFFSET	66.874	56.2341	70.9306	79.5271	53.8956	66.874		65.7226			Rin VC	239.489	27.5	37.5	44.5	46.5	59	77		OFFSET	66.874	56.2341	70.9306	59.6453
				300	35.5	43.3571	49.7857	50	59.6429	78.75								32	44.5	50.5	40	60	78.5															32.5	38	51.5	57.5	60	79
	very first AP			350	41.8125	50.9286	58.2857	58.375	62.7143	79.25						very first AP		38	50	58.5	41	61	79.5													very first AP		30.5	38	56	64.5	61	79.5
	max dv/dt (no filter)	762.205	45.1866	400	47	54.4286	62.2857	67.6875	65.8571	79.5833						max dv/dt (no filter)	897.6	44	58.5	63.5	55	61	79.5													max dv/dt (no filter)	623.8	27	36	52	64.5	63.5	79.5
	threshold	-35.2711	0.918218	450	49.3125	56.9286	64.2143	74.5625	67.2857	80.1667						threshold	-38.008	48	59.5	69.5	73	64	80.5													threshold	-35.652	25.5	33.5	48	63.5	64.5	81
	AP width	0.531714	0.0150027	500	51.9375	57.0714	66.2143	77.125	69.0714	80.6667						AP width	0.526	59	63.5	75.5	80	70.5	81													AP width	0.505	25.5	32	49	59.5	65	81.5
				550	50.5	55.8571	66.0714	77.3125	71.5714	81								62	63.5	78	80	75	81.5															24	30.5	45.5	59	66.5	82
				600	50	53.3571	63.8571	76.4375	74.5	81.1667								65	63	74.5	80	79	82															22.5	29	43.5	56.5	67	82.5
				650	47.3125	49.4286	61.9286	75.625	76.2857	81.75								63	56	71.5	80	80.5	82.5															22.5	27.5	42.5	54.5	67	83
				700	44.8125	46.5	59.4286	74.875	76.7143	82.3333								58	51	71.5	81	80	83															20	27.5	40	53	65.5	83.5
				750	41.8125	44.5	55.7857	73.5625	76.7857	82.6667								51	51.5	66.5	82	81.5	83															19.5	26	39	52.5	66.5	83.5
												current						5	10	20	40	60	80			5	10	20	40	60	80							5	10	20	40	60	80			5	10	20	40
												50		spike count				0	0	0	0	0	0		50	x	x	x	x	x	x							0	0	0	0	0	0		50	x	x	x	x
												100						4	0	0	0	0	0		100	4	x	x	x	x	x							2	0	0	0	0	0		100	2	x	x	x
												150						11	18	18	11	20	11		150	11	18	18	11	20	11							11	16	17	15	9	16		150	11	16	17	15
												200						19	29	26	23	46	36		200	19	29	26	23	46	36							19	27	26	38	42	45		200	19	27	26	38
												250						26	37	38	39	59	68		250	26	37	38	39	59	68							25	37	39	39	58	76		250	25	37	39	39
												300						32	41	43	40	59	78		300	32	41	43	40	59	78							30	41	45	43	59	79		300	30	41	45	43
												350						38	49	57	41	61	79		350	38	49	57	41	61	79							30	39	55	58	59	79		350	30	39	55	58
												400						44	57	60	55	61	79		400	44	57	60	55	61	79							26	38	51	64	61	79		400	26	38	51	64
												450						48	59	61	73	61	80		450	48	59	61	73	61	80							25	37	46	65	61	81		450	25	37	46	65
												500						59	66	72	80	67	81		500	59	66	72	80	67	81							26	35	48	61	62	81		500	26	35	48	61
												550						62	68	80	80	76	81		550	62	68	80	80	76	81							24	32	45	59	64	81		550	24	32	45	59
												600						65	70	78	80	82	82		600	65	70	78	80	82	82							22	30	42	58	65	82		600	22	30	42	58
												650						63	61	74	80	82	82		650	63	61	74	80	82	82							22	28	42	55	67	82		650	22	28	42	55
												700						58	56	73	81	82	82		700	58	56	73	81	82	82							20	29	40	53	66	83		700	20	29	40
												750						51	56	69	82	82	82		750	51	56	69	82	82	82							19	27	38	52	66	83		750	19	27
												current						5	10	20	40	60	80			5	10	20	40	60	80							5	10	20	40	60	80			5	10	20	40
												50							0	0		0	0			x	x	x	x	x	x							0	0	0	0	0	0			x	x	x	x
												100							10	12		4	8			x	10	12	x	4	8							6	12	4	8	6	0			6	12	4	8
												150							21	24		43	40			x	21	24	x	43	40							15	22	23	38	54	40			15	22	23	38
												200							33	40		59	70			x	33	40	x	59	70							25	34	39	40	59	76			25	34	39	40
												250							39	45		59	79			x	39	45	x	59	79							30	38	50	54	60	78			30	38	50	54
												300							48	58		61	79			x	48	58	x	61	79							35	35	58	72	61	79			35	35	58	72
												350							51	60		61	80			x	51	60	x	61	80							31	37	57	71	63	80			31	37	57	71
												400							60	67		61	80			x	60	67	x	61	80							28	34	53	65	66	80			28	34	53	65
												450							60	78		67	81			x	60	78	x	67	81							26	30	50	62	68	81			26	30	50	62
												500							61	79		74	81			x	61	79	x	74	81							25	29	50	58	68	82			25	29	50	58
												550							59	76		74	82			x	59	76	x	74	82							24	29	46	59	69	83			24	29	46	59
												600							56	71		76	82			x	56	71	x	76	82							23	28	45	55	69	83			23	28	45	55
												650							51	69		79	83			x	51	69	x	79	83							23	27	43	54	67	84			23	27	43	54
												700							46	70		78	84			x	46	70	x	78	84							20	26	40	53	65	84			20	26	40	53
												750							47	64		81	84			x	47	64	x	81	84							20	25	40	53	67	84			20	25	40	53
														1st derivative of spike count				4								4												2								2
																		7	18	18	11	20	11			7	18	18	11	20	11							9	16	17	15	9	16			9	16	17	15
																		8	11	8	12	26	25			8	11	8	12	26	25							8	11	9	23	33	29			8	11	9	23
																		7	8	12	16	13	32			7	8	12	16	13	32							6	10	13	1	16	31			6	10	13	1
																		6	4	5	1	0	10			6	4	5	1		10							5	4	6	4	1	3			5	4	6	4
																		6	8	14	1	2	1			6	8	14	1									0	-2	10	15	0	0					10	15
																		6	8	3	14	0	0			6	8	3	14									-4	-1	-4	6	2	0						6
																		4	2	1	18	0	1			4	2	1	18									-1	-1	-5	1	0	2
																		11	7	11	7	6	1			11	7	11	7									1	-2	2	-4	1	0
																		3	2	8	0	9	0			3	2	8										-2	-3	-3	-2	2	0
																		3	2	-2	0	6	1			3	2											-2	-2	-3	-1	1	1
																		-2	-9	-4	0	0	0															0	-2	0	-3	2	0
																		-5	-5	-1	1	0	0															-2	1	-2	-2	-1	1
																		-7	0	-4	1	0	0															-1	-2	-2	-1	0	0
																			10	12		4	8				10	12		4	8							6	12	4	8	6	0			6	12	4	8
																			11	12		39	32				11	12		39	32							9	10	19	30	48	40			9	10	19	30
																			12	16		16	30				12	16		16	30							10	12	16	2	5	36			10	12	16	2
																			6	5		0	9				6	5			9							5	4	11	14	1	2			5	4	11	14
																			9	13		2	0				9	13										5	-3	8	18	1	1			5		8	18
																			3	2		0	1				3	2										-4	2	-1	-1	2	1				2
																			9	7		0	0				9	7										-3	-3	-4	-6	3	0
																			0	11		6	1					11										-2	-4	-3	-3	2	1
																			1	1		7	0															-1	-1	0	-4	0	1
																			-2	-3		0	1															-1	0	-4	1	1	1
																			-3	-5		2	0															-1	-1	-1	-4	0	0
																			-5	-2		3	1															0	-1	-2	-1	-2	1
																			-5	1		-1	1															-3	-1	-3	-1	-2	0
																			1	-6		3	0															0	-1	0	0	2	0
[truncated: 87 more columns]

## Sheet: dpi34
szj712c2
bjd730c2b		dpi34				SUMMARY								INDIVIDUAL CELLS >		INDIVIDUAL CELLS >
bjd730c2c
bjd730c2d	N=	9															99.4832	150	200	200	250	250	300														81.7622	150	150	150	200	200	250
bjd730c2e		average	sem		5	10	20	40	60	80						szj712c2		5	10	20	40	60	80			5	10	20	40	60	80		average			bjd730c2b		5	10	20	40	60	80			5	10	20	40
bjd0731c2b	Rin	333.215	42.4194													Rin	250.049	8.5	12	16	19.5	24.5	32													Rin	416.58	10	15.5	19.5	22.5	42	34.5
nm0233c22	Mtau	30.7267	2.07308									VAR	1.56925	0.105751		Mtau	22.96								VAR	0.802857	0.857895	1.23363	0.725412	1.025	1.47835		1.02052			Mtau	38.24								VAR	1.56818	0.937778	1.83556	1.33695
bjd0731c2a	max AP	78	6.71441	current	average firing frequency											max AP	89																			max AP	52
bjd730c2a				50	0	0	0	0	0	0								0	0	0	0	0	0															0	0	0	0	0	0
	RMP	-82.3584	1.33938	100	1.625	1.8125	1.875	2	0.777778	2.25		ASL	2.34758	0.0812979		RMP	-86.7003	0	0	0	0	0	0		ASL	2.55551	2.37171	1.85947	1.79572	1.29099	2.19414		2.01126			RMP	-82.7942	1.5	0	0	0	0	0		ASL	3.01869	3.35201	2.59384	1.68278
	tested MP	-85.5081	0.648125	150	8.75	10.625	10.125	8.14286	7.27778	12.3125						tested MP		4	0	0.5	0	0	0													tested MP		10.5	15.5	14.5	9.5	10.5	9
				200	16.1875	22.1875	23.875	22.5	26.7778	32.5625								10.5	11.5	13	12	10.5	11															20.5	26	34	30.5	52.5	37.5
	Rin VC	349.029	47.2696	250	23.1875	31.3125	34.375	36.7857	44.3889	57.1875		OFFSET	86.8155	4.52036		Rin VC	239.66	16.5	22.5	26.5	29	31.5	34.5		OFFSET	100.311	112.468	94.5742	99.4088	89.826	100.311		99.4832			Rin VC	425.329	27	36.5	41.5	40	59	69.5		OFFSET	100.311	84.3512	70.9306	79.5271
				300	30.625	39.9375	44.0625	46.7143	59.0556	73.3125								24.5	30.5	39	39	56	66.5															35	44.5	52.5	45.5	59.5	79
	very first AP			350	37.1875	46.5625	51.375	51.6429	59.9444	79.5625						very first AP		30.5	40	45	45	59	78.5													very first AP		39	48	58	55.5	60.5	79.5
	max dv/dt (no filter)	672.627	34.8295	400	43.5625	53.25	56.4375	59.1429	62.4444	79.8125						max dv/dt (no filter)	818.75	38	48	57.5	56.5	59	79													max dv/dt (no filter)		40.5	49	54	65	61	80
	threshold	-37.4337	0.499407	450	48.3125	58.1875	63	68.7143	64.5556	80.125						threshold	-36.224	44	56	61	69	60	79													threshold	-35.518	34.5	46.5	52	67.5	62	80.5
	AP width	0.587111	0.0278071	500	51.875	60.3125	66.5	75.5	68.8889	80.4375						AP width	0.448	51	60.5	67	78.5	61	79.5													AP width	0.475	32	42	50	69	64	81
				550	55.25	61	68.875	78.3571	71.7222	80.75							0.279	55	66.5	76	80	66	80														0.34	30	41	47.5	66	65.5	81
				600	57	58.4375	68.25	78.0714	73.3333	81.25							0.609	58	71.5	78.5	80	71.5	80.5														0.72	28.5	37	45	62	65.5	81.5
				650	55.625	56.4375	67.8125	77.3571	74.9444	81.375								53	75	79.5	81	77	81															26	35.5	44	58.5	65.5	82
				700	52.1875	53.1875	67.375	76.9286	75.1667	81.6875								55.5	72.5	77	82	82.5	81															23.5	33	42.5	57	65	82.5
				750	48.1875	50.8125	65	74.9286	75.2778	82.0625								50.5	67.5	74.5	83.5	87.5	82															23	33	39	53.5	65	83
												current						5	10	20	40	60	80			5	10	20	40	60	80							5	10	20	40	60	80			5	10	20	40
												50		spike count				0	0	0	0	0	0		50	x	x	x	x	x	x							0	0	0	0	0	0		50	x	x	x	x
												100						0	0	0	0	0	0		100	x	x	x	x	x	x							0	0	0	0	0	0		100	x	x	x	x
												150						4	0	0	0	0	0		150	4	x	x	x	x	x							9	18	10	7	9	8		150	9	18	10	7
												200						10	10	9	10	10	7		200	10	10	9	10	10	7							19	28	29	22	54	28		200	19	28	29	22
												250						16	21	23	22	29	27		250	16	21	23	22	29	27							25	39	40	40	59	60		250	25	39	40	40
												300						24	29	39	39	55	57		300	24	29	39	39	55	57							33	47	50	41	59	79		300	33	47	50	41
												350						30	38	43	40	59	78		350	30	38	43	40	59	78							39	45	58	44	60	79		350	39	45	58	44
												400						37	48	56	49	59	79		400	37	48	56	49	59	79							42	39	53	57	61	80		400	42	39	53	57
												450						44	54	60	62	60	79		450	44	54	60	62	60	79							35	37	51	70	61	81		450	35	37	51	70
												500						49	60	62	77	61	79		500	49	60	62	77	61	79							35	35	49	76	64	81		500	35	35	49	76
												550						55	65	74	80	62	80		550	55	65	74	80	62	80							30	33	47	71	65	81		550	30	33	47	71
												600						61	69	77	80	64	80		600	61	69	77	80	64	80							28	30	45	65	65	82		600	28	30	45	65
												650						63	73	79	81	68	81		650	63	73	79	81	68	81							26	29	43	62	65	82		650	26	29	43	62
												700						65	70	75	82	72	81		700	65	70	75	82	72	81							24	27	40	59	65	82		700	24	27	40
												750						61	66	73	84	76	82		750	61	66	73	84	76	82							24	28	36	56	65	83		750	24	28
												current						5	10	20	40	60	80			5	10	20	40	60	80							5	10	20	40	60	80			5	10	20	40
												50						0	0	0	0	0	0			x	x	x	x	x	x							0	0	0	0	0	0			x	x	x	x
												100						0	0	0	0	0	0			x	x	x	x	x	x							3	0	0	0	0	0			3	x	x	x
												150						4	0	1	0	0	0			4	x	1	x	x	x							12	13	19	12	12	10			12	13	19	12
												200						11	13	17	14	11	15			11	13	17	14	11	15							22	24	39	39	51	47			22	24	39	39
												250						17	24	30	36	34	42			17	24	30	36	34	42							29	34	43	40	59	79			29	34	43	40
												300						25	32	39	39	57	76			25	32	39	39	57	76							37	42	55	50	60	79			37	42	55	50
												350						31	42	47	50	59	79			31	42	47	50	59	79							39	51	58	67	61	80			39	51	58	67
												400						39	48	59	64	59	79			39	48	59	64	59	79							39	59	55	73	61	80			39	59	55	73
												450						44	58	62	76	60	79			44	58	62	76	60	79							34	56	53	65	63	80			34	56	53	65
												500						53	61	72	80	61	80			53	61	72	80	61	80							29	49	51	62	64	81			29	49	51	62
												550						55	68	78	80	70	80			55	68	78	80	70	80							30	49	48	61	66	81			30	49	48	61
												600						55	74	80	80	79	81			55	74	80	80	79	81							29	44	45	59	66	81			29	44	45	59
												650						43	77	80	81	86	81			43	77	80	81	86	81							26	42	45	55	66	82			26	42	45	55
												700						46	75	79	82	93	81			46	75	79	82	93	81							23	39	45	55	65	83			23	39	45	55
												750						40	69	76	83	99	82			40	69	76	83	99	82							22	38	42	51	65	83			22	38	42	51
														1st derivative of spike count
																		4								4												9	18	10	7	9	8			9	18	10	7
																		6	10	9	10	10	7			6	10	9	10	10	7							10	10	19	15	45	20			10	10	19	15
																		6	11	14	12	19	20			6	11	14	12	19	20							6	11	11	18	5	32			6	11	11	18
																		8	8	16	17	26	30			8	8	16	17	26	30							8	8	10	1	0	19			8	8	10	1
																		6	9	4	1	4	21			6	9	4		4	21							6	-2	8	3	1	0			6		8	3
																		7	10	13	9	0	1			7	10	13	9									3	-6	-5	13	1	1			3			13
																		7	6	4	13	1	0			7	6	4	13									-7	-2	-2	13	0	1						13
																		5	6	2	15	1	0			5	6	2	15									0	-2	-2	6	3	0						6
																		6	5	12	3	1	1			6	5	12	3									-5	-2	-2	-5	1	0
																		6	4	3	0	2	0			6	4	3		2								-2	-3	-2	-6	0	1
																		2	4	2	1	4	1			2	4	2		4								-2	-1	-2	-3	0	0
																		2	-3	-4	1	4	0			2				4								-2	-2	-3	-3	0	0
																		-4	-4	-2	2	4	1							4								0	1	-4	-3	0	1
																																						3								3
																		4		1						4												9	13	19	12	12	10			9	13	19	12
																		7	13	16	14	11	15			7	13	16	14	11	15							10	11	20	27	39	37			10	11	20	27
																		6	11	13	22	23	27			6	11	13	22	23	27							7	10	4	1	8	32			7	10	4	1
																		8	8	9	3	23	34			8	8	9	3	23	34							8	8	12	10	1	0			8	8	12	10
																		6	10	8	11	2	3			6	10	8	11	2	3							2	9	3	17	1	1			2	9	3	17
																		8	6	12	14	0	0			8	6	12	14									0	8	-3	6	0	0				8		6
																		5	10	3	12	1	0			5	10	3	12									-5	-3	-2	-8	2	0
																		9	3	10	4	1	1			9	3	10	4									-5	-7	-2	-3	1	1
																		2	7	6	0	9	0			2	7	6		9								1	0	-3	-1	2	0
																		0	6	2	0	9	1				6	2		9								-1	-5	-3	-2	0	0
																		-12	3	0	1	7	0				3			7								-3	-2	0	-4	0	1
																		3	-2	-1	1	7	0							7								-3	-3	0	0	-1	1
																		-6	-6	-3	1	6	1							6								-1	-1	-3	-4	0	0
[truncated: 103 more columns]

## Sheet: dpi47
bjd0789c2b
bjd0789c2a		dpi47				SUMMARY								INDIVIDUAL CELLS >		INDIVIDUAL CELLS >
bjd0789c2d
nm305c22	N=	9															164.886	250	300	350	400	450	500														118.091	200	200	250	300	300	350
nm305c23		average	sem		5	10	20	40	60	80						bjd0789c2b		5	10	20	40	60	80			5	10	20	40	60	80		average			bjd0789c2a		5	10	20	40	60	80			5	10	20	40
nm305c24	Rin	238.252	22.8338													Rin	166.211	5	8.5	10	16	17	23													Rin	176.151	6	9	17	19	25	24
nm306c31	Mtau	26.9823	1.1857									VAR	1.08801	0.171571		Mtau	25.04								VAR	0.312727	0.450877	0.349444	0.526374	0.516111	0.590476		0.457668			Mtau	30.3556								VAR	0.157576	0.381818	1.17091	0.864286
bjd788c1	max AP	65.5	6.76915	current	average firing frequency											max AP	54																			max AP	65
bjd0789c2c				50	0	0	0	0	0	0								0	0	0	0	0	0															0	0	0	0	0	0
	RMP	-70.0143	11.7574	100	0.666667	0.6875	0.611111	0.25	0.333333	0.722222		ASL	1.91107	0.166995		RMP	-82.4258	0	0	0	0	0	0		ASL	1.42295	1.51456	1.31928	1.2875	1.26948	1.26178		1.34593			RMP	-80.9373	0	0	0	0	0	0		ASL	1.93793	1.81112	1.40262	1.78443
	tested MP	#DIV/0!	#DIV/0!	150	5.11111	7.125	5.88889	7	5.11111	9.11111						tested MP		0	0	0	0	0	0													tested MP		0	0	0	0	0	0
				200	10.5	14.9375	16.1111	18.0625	20.3333	24.6667								0	0	0	0	0	0															4	6	0	0	0	0
	Rin VC	176.929	26.2296	250	16.7222	21.3125	25.6111	26.9375	36.7778	37.1111		OFFSET	115.292	18.4824		Rin VC	106.979	4	0	0	0	0	0		OFFSET	167.185	168.702	165.505	159.054	161.687	167.185		164.886			Rin VC	104.911	9	12	17	16	17	12		OFFSET	133.748	112.468	118.218	119.291
				300	21.6111	28.9375	33.2222	34.0625	43.6667	50.1111								6	8.5	3	0	0	0															14	19	22	35	42	28
	very first AP			350	28	34.8125	41.3333	43.8125	47.5	58.4444						very first AP		9	11	12	11	10	8													very first AP		20	28	34	39	57	52
	max dv/dt (no filter)	731.093	53.3932	400	33.8889	42.125	47.2222	53.3125	50.2222	63.3889						max dv/dt (no filter)	x1025	13	17	19	24.5	20	17													max dv/dt (no filter)	980.8	24	35	39	39	59	75
	threshold	-37.6593	0.858249	450	38.9444	46.3125	54.3333	58.375	55	65.5						threshold	x-33.087	16	20.5	24	34	34	29													threshold	-40.427	29	39	44	42	59	79
	AP width	0.494571	0.011017	500	43.3889	50.125	59.8333	62.8125	63.4444	68.2222						AP width	x0.56	19	26.5	34	39	51	45													AP width	0.55	33	46	54	54	60	79
				550	46.8333	52.0625	62	66	71.9444	71.8889								24	29.5	39	39	58	68															38	49	59	67	60	79
				600	47.6667	53.375	61.9444	69.625	76.3889	74.3889								26	35.5	40	40	59	78															42	56	60	79	61	80
				650	46.6111	53	61.7778	71.6875	75.5	75.8889							10.687	29	39	47	41.5	59	78														13.717	46	59	62	80	61	80
				700	46.2222	51.1875	61.1111	74.0625	76.6667	77.8333							-42.924	34	40	53	50	59	79														-46.337	49	59	67	80	63	80
				750	43.8889	49.875	60.7778	74.625	76.1667	79.2778							-9.837	35	45.5	59	57.5	59	79														-5.91	52	63	69	80	66	80
												current						5	10	20	40	60	80			5	10	20	40	60	80							5	10	20	40	60	80			5	10	20	40
												50		spike count				0	0	0	0	0	0		50	x	x	x	x	x	x							0	0	0	0	0	0		50	x	x	x	x
												100						0	0	0	0	0	0		100	x	x	x	x	x	x							0	0	0	0	0	0		100	x	x	x	x
												150						0	0	0	0	0	0		150	x	x	x	x	x	x							0	0	0	0	0	0		150	x	x	x	x
												200						0	0	0	0	0	0		200	x	x	x	x	x	x							4	6	0	0	0	0		200	4	6	x	x
												250						4	0	0	0	0	0		250	4	x	x	x	x	x							9	12	17	16	17	12		250	9	12	17	16
												300						6	8	3	0	0	0		300	6	8	3	x	x	x							14	19	22	35	42	28		300	14	19	22	35
												350						9	10	12	9	10	8		350	9	10	12	9	10	8							20	28	34	39	57	52		350	20	28	34	39
												400						13	15	19	18	20	17		400	13	15	19	18	20	17							24	35	39	39	59	75		400	24	35	39	39
												450						16	19	24	32	34	29		450	16	19	24	32	34	29							29	39	44	42	59	79		450	29	39	44	42
												500						19	25	34	39	51	45		500	19	25	34	39	51	45							33	46	54	54	60	79		500	33	46	54	54
												550						24	29	39	39	58	68		550	24	29	39	39	58	68							38	49	59	67	60	79		550	38	49	59	67
												600						26	34	40	40	59	78		600	26	34	40	40	59	78							42	56	60	79	61	80		600	42	56	60	79
												650						29	39	47	40	59	78		650	29	39	47	40	59	78							46	59	62	80	61	80		650	46	59	62	80
												700						34	39	53	49	59	79		700	34	39	53	49	59	79							49	59	67	80	63	80		700	49	59	67
												750						35	45	59	57	59	79		750	35	45	59	57	59	79							52	63	69	80	66	80		750	52	63
												current						5	10	20	40	60	80			5	10	20	40	60	80							5	10	20	40	60	80			5	10	20	40
												50							0		0					x	x	x	x	x	x															x	x	x	x
												100							0		0					x	x	x	x	x	x															x	x	x	x
												150							0		0					x	x	x	x	x	x															x	x	x	x
												200							0		0					x	x	x	x	x	x															x	x	x	x
												250							0		0					x	x	x	x	x	x															x	x	x	x
												300							9		0					x	9	x	x	x	x															x	x	x	x
												350							12		13					x	12	x	13	x	x															x	x	x	x
												400							19		31					x	19	x	31	x	x															x	x	x	x
												450							22		36					x	22	x	36	x	x															x	x	x	x
												500							28		39					x	28	x	39	x	x															x	x	x	x
												550							30		39					x	30	x	39	x	x															x	x	x	x
												600							37		40					x	37	x	40	x	x															x	x	x	x
												650							39		43					x	39	x	43	x	x															x	x	x	x
												700							41		51					x	41	x	51	x	x															x	x	x	x
												750							46		58					x	46	x	58	x	x															x	x	x	x
														1st derivative of spike count
																																						4	6							4	6
																		4								4												5	6	17	16	17	12			5	6	17	16
																		2	8	3						2	8	3										5	7	5	19	25	16			5	7	5	19
																		3	2	9	9	10	8			3	2	9	9	10	8							6	9	12	4	15	24			6	9	12	4
																		4	5	7	9	10	9			4	5	7	9	10	9							4	7	5	0	2	23			4	7	5
																		3	4	5	14	14	12			3	4	5	14	14	12							5	4	5	3	0	4			5	4	5	3
																		3	6	10	7	17	16			3	6	10	7	17	16							4	7	10	12	1	0			4	7	10	12
																		5	4	5	0	7	23			5	4	5		7	23							5	3	5	13	0	0			5	3	5	13
																		2	5	1	1	1	10			2	5	1	1	1	10							4	7	1	12	1	1			4	7	1	12
																		3	5	7	0	0	0			3	5	7										4	3	2	1	0	0			4	3	2
																		5	0	6	9	0	1			5		6	9		1							3	0	5	0	2	0			3		5
																		1	6	6	8	0	0			1	6	6	8									3	4	2	0	3	0			3	4	2
																			0		0
																			0		0
																			0		0
																			0		0
																			9		0						9
																			3		13						3		13
																			7		18						7		18
																			3		5						3		5
																			6		3						6		3
																			2		0						2
																			7		1						7
																			2		3						2		3
																			2		8						2		8
																			5		7						5		7
[truncated: 111 more columns]

## Sheet: dpi55
bjd842c1a
bjd842c1b		dpi55				SUMMARY								INDIVIDUAL CELLS >		INDIVIDUAL CELLS >
nm390c22
bjd842c1c	N=	8															102.27	150	200	200	250	250	350														81.7622	150	150	150	200	200	250
job145c12		average	sem		5	10	20	40	60	80						bjd842c1a		5	10	20	40	60	80			5	10	20	40	60	80		average			bjd842c1b		5	10	20	40	60	80			5	10	20	40
job145c14	Rin	255.505	20.082													Rin	264.27	3.5	7.5	13.5	8.5	10	10													Rin	372.733	9.5	12.5	16.5	20	22.5	20.5
job145c15	Mtau	26.1122	1.68366									VAR	1.28519	0.168846		Mtau	30.66								VAR	0.490909	1.625	0.869883	0.884091	0.820909	0.277083		0.827979			Mtau	33.3015								VAR	0.851429	0.96	1.03897	0.820714
bjd843c1b	max AP	59.375	6.0767	current	average firing											max AP	38																			max AP	72
0				50	0	0	0	0	0	0								0	0	0	0	0	0															0	0	0	0	0	0
	RMP	-80.5606	1.48997	100	1	0.375	0	0	0	0		ASL	2.16555	0.171221		RMP	-79.9662	0	0	0	0	0	0		ASL	2.07344	2.10819	1.61232	1.23616	1.11495	1.47208		1.60286			RMP	-71.9146	0.5	2	0	0	0	0		ASL	2.49162	2.46658	1.74939	1.67601
	tested MP	#DIV/0!	#DIV/0!	150	6.9375	8.4375	9.0625	10.6875	10	7.71429						tested MP		4	1	6.5	0	0	0													tested MP		10	14.5	16.5	18.5	14.5	15.5
				200	14.8125	20.4375	20.75	21.6875	27.375	21.0714								10	16	17	12	16	6															18	26	28	35	37	32
	Rin VC	173.629	15.4513	250	21.4375	30.4375	33.875	35.8125	45.6875	40.0714		OFFSET	91.871	5.92964		Rin VC	191.532	15	23	25.5	27	35	19		OFFSET	100.311	112.468	94.5742	99.4088	89.826	117.03		102.27			Rin VC	245.68	23	34	37.5	39.5	52	47.5		OFFSET	100.311	84.3512	70.9306	79.5271
				300	28.1875	38.3125	43.125	46.375	56.4375	57.8571								19	31	35.5	40	55	32															29.5	39.5	42.5	43.5	59.5	66
	very first AP			350	33.5625	45.0625	52.0625	56.1875	59.5	69.2143						very first AP		23	38	42	41	59	48													very first AP		33.5	45.5	51	52	60	79.5
	max dv/dt (no filter)	691.906	85.6351	400	38.6875	50	58.5625	65.6875	61.8125	75.7143						max dv/dt (no filter)	498.13	28	43	48	49	60	68													max dv/dt (no filter)	642.988	38.5	51.5	58	62	61	80
	threshold	-37.6226	0.680123	450	42.75	53.8125	63.0625	72	66.5	79.1429						threshold	-36.733	35	51	59	59	61	79													threshold	-35.062	43.5	56	61	74	61	80
	AP width	0.472375	0.0061989	500	45.375	56.5625	66.8125	76.5	75	80						AP width	0.451	40	58	61.5	76	62	80													AP width	0.486	48.5	59.5	63.5	80	62.5	81
				550	47.875	57.5625	67.0625	77.9375	82.0625	80.5714								46	60	63	81	72	81															53	57	67	80.5	67	81
				600	49.625	56.9375	66.375	79.1875	87.625	81.0714								47	59	67.5	81	80	81															57	55.5	66.5	77.5	72.5	81.5
				650	49.9375	53.625	66.4375	80.625	89.0625	81.6429								51	55	66.5	83	88	82															56	50	63.5	75.5	78	82
				700	47.5	51.375	64.4375	79.75	88.1875	82.2143								51	52	63	85	95	82															49	47	58	73.5	83.5	82
				750	43.4375	49.0625	62.5625	79.8125	87.1875	83.5714								43	48	63.5	86	92	83															41	44	54.5	70.5	83	83
												current						5	10	20	40	60	80			5	10	20	40	60	80							5	10	20	40	60	80			5	10	20	40
												50		spike count				0	0	0	0	0	0		50	x	x	x	x	x	x							0	0	0	0	0	0		50	x	x	x	x
												100						0	0	0	0	0	0		100	x	x	x	x	x	x							0	0	0	0	0	0		100	x	x	x	x
												150						4	1	0	0	0	0		150	4	1	x	x	x	x							10	12	16	14	13	16		150	10	12	16	14
												200						10	16	14	12	16	6		200	10	16	14	12	16	6							17	24	26	31	32	29		200	17	24	26	31
												250						15	23	21	27	35	19		250	15	23	21	27	35	19							21	30	35	39	46	43		250	21	30	35	39
												300						19	31	32	40	55	32		300	19	31	32	40	55	32							28	38	41	41	59	59		300	28	38	41	41
												350						23	38	41	41	59	48		350	23	38	41	41	59	48							32	42	47	47	60	79		350	32	42	47	47
												400						28	43	43	49	60	68		400	28	43	43	49	60	68							36	49	56	56	61	80		400	36	49	56	56
												450						35	51	57	59	61	79		450	35	51	57	59	61	79							40	53	61	69	61	80		450	40	53	61	69
												500						40	58	62	76	62	80		500	40	58	62	76	62	80							46	60	63	80	62	81		500	46	60	63	80
												550						46	60	63	81	72	81		550	46	60	63	81	72	81							49	65	67	80	65	81		550	49	65	67	80
												600						47	59	68	81	80	81		600	47	59	68	81	80	81							55	63	70	81	72	82		600	55	63	70	81
												650						51	55	70	83	88	82		650	51	55	70	83	88	82							59	58	68	82	79	82		650	59	58	68	82
												700						51	52	69	85	95	82		700	51	52	69	85	95	82							55	53	60	80	88	82		700	55	53	60
												750						43	48	69	86	92	83		750	43	48	69	86	92	83							46	47	56	76	85	83		750	46	47
												current						5	10	20	40	60	80			5	10	20	40	60	80							5	10	20	40	60	80			5	10	20	40
												50								0						x	x	x	x	x	x							0	0	0	0	0	0			x	x	x	x
												100								0						x	x	x	x	x	x							1	4	0	0	0	0			1	4	x	x
												150								13						x	x	13	x	x	x							10	17	17	23	16	15			10	17	17	23
												200								20						x	x	20	x	x	x							19	28	30	39	42	35			19	28	30	39
												250								30						x	x	30	x	x	x							25	38	40	40	58	52			25	38	40	40
												300								39						x	x	39	x	x	x							31	41	44	46	60	73			31	41	44	46
												350								43						x	x	43	x	x	x							35	49	55	57	60	80			35	49	55	57
												400								53						x	x	53	x	x	x							41	54	60	68	61	80			41	54	60	68
												450								61						x	x	61	x	x	x							47	59	61	79	61	80			47	59	61	79
												500								61						x	x	61	x	x	x							51	59	64	80	63	81			51	59	64	80
												550								63						x	x	63	x	x	x							57	49	67	81	69	81			57	49	67	81
												600								67						x	x	67	x	x	x							59	48	63	74	73	81			59	48	63	74
												650								63						x	x	63	x	x	x							53	42	59	69	77	82			53	42	59	69
												700								57						x	x	57	x	x	x							43	41	56	67	79	82			43	41	56	67
												750								58						x	x	58	x	x	x							36	41	53	65	81	83			36	41	53	65
														1st derivative of spike count				0	0	0	0	0	0															0	0	0	0	0	0
																		4	1	0	0	0	0			4	1											10	12	16	14	13	16			10	12	16	14
																		6	15	14	12	16	6			6	15	14	12	16	6							7	12	10	17	19	13			7	12	10	17
																		5	7	7	15	19	13			5	7	7	15	19	13							4	6	9	8	14	14			4	6	9	8
																		4	8	11	13	20	13			4	8	11	13	20	13							7	8	6	2	13	16			7	8	6	2
																		4	7	9	1	4	16			4	7	9	1	4	16							4	4	6	6	1	20			4	4	6	6
																		5	5	2	8	1	20			5	5	2	8	1	20							4	7	9	9	1	1			4	7	9	9
																		7	8	14	10	1	11			7	8	14	10	1	11							4	4	5	13	0	0			4	4	5	13
																		5	7	5	17	1	1			5	7	5	17	1								6	7	2	11	1	1			6	7	2	11
																		6	2	1	5	10	1			6	2	1	5	10								3	5	4	0	3	0			3	5	4
																		1	-1	5	0	8	0			1		5		8								6	-2	3	1	7	1			6		3
																		4	-4	2	2	8	1			4		2	2	8								4	-5	-2	1	7	0			4
																		0	-3	-1	2	7	0						2	7								-4	-5	-8	-2	9	0
																		-8	-4	0	1	-3	1						1									-9	-6	-4	-4	-3	1
																		0	0	0	0	0	0															1	4	0	0	0	0
																		0	0	13	0	0	0					13										9	13	17	23	16	15			9	13	17	23
																		0	0	7	0	0	0					7										9	11	13	16	26	20			9	11	13	16
																		0	0	10	0	0	0					10										6	10	10	1	16	17			6	10	10	1
																		0	0	9	0	0	0					9										6	3	4	6	2	21			6		4	6
																		0	0	4	0	0	0					4										4	8	11	11	0	7			4	8	11	11
																		0	0	10	0	0	0					10										6	5	5	11	1	0			6	5	5	11
																		0	0	8	0	0	0					8										6	5	1	11	0	0			6	5		11
																		0	0	0	0	0	0															4	0	3	1	2	1			4		3
																		0	0	2	0	0	0					2										6	-10	3	1	6	0			6
																		0	0	4	0	0	0					4										2	-1	-4	-7	4	0			2
																		0	0	-4	0	0	0															-6	-6	-4	-5	4	1
																		0	0	-6	0	0	0															-10	-1	-3	-2	2	0
																		0	0	1	0	0	0															-7	0	-3	-2	2	1
[truncated: 97 more columns]

## Sheet: dpi63
nm309c32
nm309c33		dpi63				SUMMARY								INDIVIDUAL CELLS >		INDIVIDUAL CELLS >
bjd792c1
bjd793c2b	N=	8															93.3832	150	200	200	200	250	250														96.1696	150	200	200	200	250	300
bjd793c2c		average	sem		5	10	20	40	60	80						nm309c32		5	10	20	40	60	80			5	10	20	40	60	80		average			nm309c33		5	10	20	40	60	80			5	10	20	40
bjd794c2b	Rin	235.93	9.82294													Rin	208.5	9.5	15.5	18	26.5	34	44.5													Rin	254.05	8	11	14	18.5	24	32.5
nm310c31	Mtau	27.4353	0.783483									VAR	1.24319	0.195496		Mtau	26.26								VAR	0.673529	1.55833	1.89667	1.82636	2.03077	3.18208		1.86129			Mtau	30.46								VAR	0.532105	0.938095	0.884191	1.22024
nm309c31	max AP	61.625	3.54027	current	average firing frequency											max AP	61																			max AP	60
0				50	0	0	0	0	0	0								0	0	0	0	0	0															0	0	0	0	0	0
	RMP	-81.6766	1.11172	100	0	0	0	0	0	0		ASL	1.9799	0.153022		RMP	-84.256	0	0	0	0	0	0		ASL	2.97266	2.56935	2.18017	2.27109	1.67829	2.88825		2.42663			RMP	-79.3554	0	0	0	0	0	0		ASL	2.52676	2.319	1.7757	1.68655
	tested MP	#DIV/0!	#DIV/0!	150	5.875	6.75	3.8125	7	7	4.4375						tested MP		5	1	0.5	0	0	0													tested MP		6	4.5	2.5	4	2.5	3
				200	13.6875	16.875	14.875	20.9375	20.9375	23.125								14	16.5	16	21.5	23	19															12.5	15.5	14	21.5	13.5	16.5
	Rin VC	140.985	10.7318	250	20.3125	27.0625	27.5	34.4375	39.9375	43.8125		OFFSET	97.5741	5.86176		Rin VC	137.933	21.5	27.5	33	38.5	57	63.5		OFFSET	100.311	112.468	94.5742	79.5271	89.826	83.5925		93.3832			Rin VC	146.412	19.5	23.5	22.5	38.5	33.5	34.5		OFFSET	100.311	112.468	94.5742	79.5271
				300	27.8125	35.1875	36.8125	41.8125	54.375	59.75								28.5	37.5	40.5	43.5	59	77.5															26.5	30.5	36	39.5	55.5	67
	very first AP			350	34.25	43.1875	48.3125	52.625	63	71.125						very first AP		37.5	44.5	57	63	59	78.5													very first AP		31.5	39	39.5	41	59	78.5
	max dv/dt (no filter)	780.727	32.6998	400	40.4375	48.75	54.3125	62.25	66.5	76.3125						max dv/dt (no filter)	740.2	43	52.5	60	77.5	60	79													max dv/dt (no filter)	812.2	37.5	46.5	48.5	53.5	59	79
	threshold	-37.9831	0.778992	450	44.9375	53.125	60.9375	69.625	67.5	79.625						threshold	-38.87	49	59	67	79.5	66.5	79.5													threshold	-36.33	42.5	49	59	70.5	59.5	79.5
	AP width	0.512571	0.0071941	500	47.8125	54.75	67.375	75.5	69.25	80.3125						AP width	0.52	54	63.5	77.5	80	78.5	80.5													AP width	0.515	49	55	60	80	61	79.5
				550	48.125	56.3125	68.125	78.4375	71.5	81.5								56	63.5	77	80.5	86.5	81															52	55	61	80	61.5	80
				600	48.6875	56.25	67.8125	81.1875	73.625	82.1875								55	58	71.5	81.5	92	82															53	53.5	64	80	62	80
				650	48.625	54.9375	69.0625	81.375	76.8125	82.625							13.198	51	54	72.5	82.5	92	82														9.1	52.5	51.5	65	81	65	81
				700	45.75	53	68.75	81.4375	79.3125	82.75							-45.675	46	51	69	82	88.5	82.5														-47.572	43.5	46.5	61.5	79.5	70	81
				750	44.3125	51.1875	67.1875	81.4375	80.125	83.625							-6.805	43	47.5	65.5	84	89	83.5														-11.242	42.5	41.5	60	79	70.5	81
												current						5	10	20	40	60	80			5	10	20	40	60	80							5	10	20	40	60	80			5	10	20	40
												50		spike count				0	0	0	0	0	0		50	x	x	x	x	x	x							0	0	0	0	0	0		50	x	x	x	x
												100						0	0	0	0	0	0		100	x	x	x	x	x	x							0	0	0	0	0	0		100	x	x	x	x
												150						5	0	0	0	0	0		150	5	x	x	x	x	x							4	0	0	3	0	0		150	4	x	x	3
												200						14	15	13	14	22	14		200	14	15	13	14	22	14							11	12	9	21	8	11		200	11	12	9	21
												250						23	27	30	38	57	55		250	23	27	30	38	57	55							17	22	19	38	26	29		250	17	22	19	38
												300						29	37	39	40	59	77		300	29	37	39	40	59	77							24	29	33	39	52	61		300	24	29	33	39
												350						39	44	57	58	59	78		350	39	44	57	58	59	78							29	39	39	42	59	78		350	29	39	39	42
												400						44	52	59	76	60	79		400	44	52	59	76	60	79							36	47	46	56	59	79		400	36	47	46	56
												450						51	59	64	79	65	79		450	51	59	64	79	65	79							41	49	59	76	59	79		450	41	49	59	76
												500						55	63	76	80	76	80		500	55	63	76	80	76	80							49	59	60	80	61	79		500	49	59	60	80
												550						60	60	77	80	84	81		550	60	60	77	80	84	81							52	60	63	80	61	80		550	52	60	63	80
												600						60	55	72	81	90	82		600	60	55	72	81	90	82							55	59	71	80	62	80		600	55	59	71	80
												650						54	52	72	82	89	82		650	54	52	72	82	89	82							61	57	76	81	66	81		650	61	57	76	81
												700						50	51	69	81	87	82		700	50	51	69	81	87	82							52	49	71	82	73	81		700	52	49	71
												750						44	45	67	83	87	83		750	44	45	67	83	87	83							48	44	69	80	73	81		750	48	44
												current						5	10	20	40	60	80			5	10	20	40	60	80							5	10	20	40	60	80			5	10	20	40
												50						0	0	0	0	0	0			x	x	x	x	x	x							0	0	0	0	0	0			x	x	x	x
												100						0	0	0	0	0	0			x	x	x	x	x	x							0	0	0	0	0	0			x	x	x	x
												150						5	2	1	0	0	0			5	2	1	x	x	x							8	9	5	5	5	6			8	9	5	5
												200						14	18	19	29	24	24			14	18	19	29	24	24							14	19	19	22	19	22			14	19	19	22
												250						20	28	36	39	57	72			20	28	36	39	57	72							22	25	26	39	41	40			22	25	26	39
												300						28	38	42	47	59	78			28	38	42	47	59	78							29	32	39	40	59	73			29	32	39	40
												350						36	45	57	68	59	79			36	45	57	68	59	79							34	39	40	40	59	79			34	39	40	40
												400						42	53	61	79	60	79			42	53	61	79	60	79							39	46	51	51	59	79			39	46	51	51
												450						47	59	70	80	68	80			47	59	70	80	68	80							44	49	59	65	60	80			44	49	59	65
												500						53	64	79	80	81	81			53	64	79	80	81	81							49	51	60	80	61	80			49	51	60	80
												550						52	67	77	81	89	81			52	67	77	81	89	81							52	50	59	80	62	80			52	50	59	80
												600						50	61	71	82	94	82			50	61	71	82	94	82							51	48	57	80	62	80			51	48	57	80
												650						48	56	73	83	95	82			48	56	73	83	95	82							44	46	54	81	64	81			44	46	54	81
												700						42	51	69	83	90	83			42	51	69	83	90	83							35	44	52	77	67	81			35	44	52	77
												750						42	50	64	85	91	84			42	50	64	85	91	84							37	39	51	78	68	81			37	39	51	78
														1st derivative of spike count
																		5								5												4			3					4			3
																		9	15	13	14	22	14			9	15	13	14	22	14							7	12	9	18	8	11			7	12	9	18
																		9	12	17	24	35	41			9	12	17	24	35	41							6	10	10	17	18	18			6	10	10	17
																		6	10	9	2	2	22			6	10	9	2	2	22							7	7	14	1	26	32			7	7	14	1
																		10	7	18	18	0	1			10	7	18	18									5	10	6	3	7	17			5	10	6	3
																		5	8	2	18	1	1			5	8	2	18									7	8	7	14	0	1			7	8	7	14
																		7	7	5	3	5	0			7	7	5	3	5								5	2	13	20	0	0			5	2	13	20
																		4	4	12	1	11	1			4	4	12		11								8	10	1	4	2	0			8	10	1	4
																		5	-3	1	0	8	1			5		1		8								3	1	3	0	0	1			3		3
																		0	-5	-5	1	6	1							6								3	-1	8	0	1	0			3		8
																		-6	-3	0	1	-1	0															6	-2	5	1	4	1			6		5
																		-4	-1	-3	-1	-2	0															-9	-8	-5	1	7	0
																		-6	-6	-2	2	0	1															-4	-5	-2	-2	0	0
																		5	2	1						5	2	1										8	9	5	5	5	6			8	9	5	5
																		9	16	18	29	24	24			9	16	18	29	24	24							6	10	14	17	14	16			6	10	14	17
																		6	10	17	10	33	48			6	10	17	10	33	48							8	6	7	17	22	18			8	6	7	17
																		8	10	6	8	2	6			8	10	6	8	2	6							7	7	13	1	18	33			7	7	13	1
																		8	7	15	21	0	1			8	7	15	21									5	7	1	0	0	6			5	7	1
																		6	8	4	11	1	0			6	8	4	11									5	7	11	11	0	0			5	7	11	11
																		5	6	9	1	8	1			5	6	9		8								5	3	8	14	1	1			5	3	8	14
																		6	5	9	0	13	1			6	5	9		13								5	2	1	15	1	0			5	2		15
																		-1	3	-2	1	8	0				3			8								3	-1	-1	0	1	0			3
																		-2	-6	-6	1	5	1							5								-1	-2	-2	0	0	0
																		-2	-5	2	1	1	0															-7	-2	-3	1	2	1
																		-6	-5	-4	0	-5	1															-9	-2	-2	-4	3	0
																		0	-1	-5	2	1	1															2	-5	-1	1	1	0
[truncated: 97 more columns]

## Sheet: dpi72
bjd0750c2b
bjd0751		dpi72				SUMMARY								INDIVIDUAL CELLS >		INDIVIDUAL CELLS >
bjd0750c2
bjd0753c2b	N=	8															205.693	350	400	450	500	500	550														233.603	350	400	500	600	650	700
nm0269c21		average	sem		5	10	20	40	60	80						bjd0750c2b		5	10	20	40	60	80			5	10	20	40	60	80		average			bjd0751		5	10	20	40	60	80			5	10	20	40
nm0269c22	Rin	188.243	22.3546													Rin	164.064	4	7.5	11	13.5	15	18													Rin	85.9	4	6	6	10	11	19
nm0270c21	Mtau	27.7361	1.79739									VAR	0.549372	0.115025		Mtau	28.51								VAR	0.23268	0.324265	0.614286	0.608056	0.514646	0.482143		0.462679			Mtau	22.387								VAR	0.155556	0.2	0.0633929	0.235714
bjd752c2a	max AP	54.8333	6.27915	current	average firing frequency											max AP	31																			max AP	?
0				50	0	0	0	0	0	0								0	0	0	0	0	0															0	0	0	0	0	0
	RMP	-83.4666	1.78271	100	0.375	0	0	0	0	0		ASL	1.37063	0.120158		RMP	-80.7809	0	0	0	0	0	0		ASL	1.29195	1.37652	1.24581	1.2491	1.26948	1.26178		1.28244			RMP	-90.5749	0	0	0	0	0	0		ASL	1.09319	1.05409	1.09008	0.790569
	tested MP	#DIV/0!	#DIV/0!	150	1.9375	1.125	0.4375	0.625	0.4375	1.4375						tested MP		0	0	0	0	0	0													tested MP		0	0	0	0	0	0
				200	4.5	4	4.6875	3.625	3.8125	4.625								0	0	0	0	0	0															0	0	0	0	0	0
	Rin VC	142.689	17.9552	250	7.1875	8.5	11.1875	12	10.8125	13.625		OFFSET	169.226	25.7943		Rin VC	179.81	0	0	0	0	0	0		OFFSET	234.059	224.937	212.792	198.818	179.652	183.904		205.693			Rin VC	102.964	0	0	0	0	0	0		OFFSET	234.059	224.937	236.435	238.581
				300	10.125	11.375	15.625	18.75	19.8125	24.3125								0	0	0	0	0	0															0	0	0	0	0	0
	very first AP			350	13.375	16.75	20.5625	20.5	28.3125	35.1875						very first AP		2.5	3	0	0	2	0													very first AP		4	2	0	0	0	0
	max dv/dt (no filter)	658.09	67.8181	400	16.125	20.5625	25.0625	23.1875	32.25	40.875						max dv/dt (no filter)	x381.098	4.5	8.5	6	3.5	11	5													max dv/dt (no filter)	912.538	6	8	4	1	0	2
	threshold	-38.5215	0.763306	450	20	24.9375	31.375	28.3125	35.6875	45.125						threshold	x-26.239	8	12	17	14.5	24	17													threshold	-40.204	9	10	9	8	6	8
	AP width	0.558333	0.0188762	500	22.75	28.875	35.0625	36.8125	38.9375	48.6875						AP width	x0.664	11.5	17	19	27.5	38	31													AP width	0.549	10	14	14	13	11	13
				550	26.3125	33.5625	39.6875	45.625	43.5625	53.5625								14.5	20.5	20	36	48.5	48															12	18	20	18	19	19
				600	29.1875	37.5	43.5625	52.5625	47.75	58.75								18	25.5	28	38.5	56	66															14	20	24	25	26	27
				650	32	41.25	47.75	56.5625	52.625	64.4375								20	29	35	38.5	59	78															16	22	30	35	36	39
				700	33.8125	45.1875	51.1875	58.5625	56.5625	68.375								24	34	39	39.5	59	79															19	26	36	39	47	50
				750	35.25	47.0625	53.625	60.0625	60.75	73.6875								26	37	39	39.5	59	79															22	30	39	40	58	69
												current						5	10	20	40	60	80			5	10	20	40	60	80							5	10	20	40	60	80			5	10	20	40
												50		spike count				0	0	0	0	0	0		50	x	x	x	x	x	x							0	0	0	0	0	0		50	x	x	x	x
												100						0	0	0	0	0	0		100	x	x	x	x	x	x							0	0	0	0	0	0		100	x	x	x	x
												150						0	0	0	0	0	0		150	x	x	x	x	x	x							0	0	0	0	0	0		150	x	x	x	x
												200						0	0	0	0	0	0		200	x	x	x	x	x	x							0	0	0	0	0	0		200	x	x	x	x
												250						0	0	0	0	0	0		250	x	x	x	x	x	x							0	0	0	0	0	0		250	x	x	x	x
												300						0	0	0	0	0	0		300	x	x	x	x	x	x							0	0	0	0	0	0		300	x	x	x	x
												350						1	0	0	0	0	0		350	1	x	x	x	x	x							4	2	0	0	0	0		350	4	2	x	x
												400						4	8	6	0	2	5		400	4	8	6	x	2	5							6	8	4	1	0	2		400	6	8	4	1
												450						8	10	17	8	13	17		450	8	10	17	8	13	17							9	10	9	8	6	8		450	9	10	9	8
												500						11	16	19	21	25	31		500	11	16	19	21	25	31							10	14	14	13	11	13		500	10	14	14	13
												550						14	19	20	33	39	48		550	14	19	20	33	39	48							12	18	20	18	19	19		550	12	18	20	18
												600						17	23	28	38	53	66		600	17	23	28	38	53	66							14	20	24	25	26	27		600	14	20	24	25
												650						19	28	35	38	59	78		650	19	28	35	38	59	78							16	22	30	35	36	39		650	16	22	30	35
												700						23	31	39	39	59	79		700	23	31	39	39	59	79							19	26	36	39	47	50		700	19	26	36
												750						24	35	39	39	59	79		750	24	35	39	39	59	79							22	30	39	40	58	69		750	22	30
												current						5	10	20	40	60	80			5	10	20	40	60	80							5	10	20	40	60	80			5	10	20	40
												50						0	0		0	0				x	x	x	x	x	x															x	x	x	x
												100						0	0		0	0				x	x	x	x	x	x															x	x	x	x
												150						0	0		0	0				x	x	x	x	x	x															x	x	x	x
												200						0	0		0	0				x	x	x	x	x	x															x	x	x	x
												250						0	0		0	0				x	x	x	x	x	x															x	x	x	x
												300						0	0		0	0				x	x	x	x	x	x															x	x	x	x
												350						4	6		0	4				4	6	x	x	4	x															x	x	x	x
												400						5	9		7	20				5	9	x	7	20	x															x	x	x	x
												450						8	14		21	35				8	14	x	21	35	x															x	x	x	x
												500						12	18		34	51				12	18	x	34	51	x															x	x	x	x
												550						15	22		39	58				15	22	x	39	58	x															x	x	x	x
												600						19	28		39	59				19	28	x	39	59	x															x	x	x	x
												650						21	30		39	59				21	30	x	39	59	x															x	x	x	x
												700						25	37		40	59				25	37	x	40	59	x															x	x	x	x
												750						28	39		40	59				28	39	x	40	59	x															x	x	x	x
														1st derivative of spike count
																		1								1												4	2							4	2
																		3	8	6	0	2	5			3	8	6		2	5							2	6	4	1		2			2	6	4	1
																		4	2	11	8	11	12			4	2	11	8	11	12							3	2	5	7	6	6			3	2	5	7
																		3	6	2	13	12	14			3	6	2	13	12	14							1	4	5	5	5	5			1	4	5	5
																		3	3	1	12	14	17			3	3	1	12	14	17							2	4	6	5	8	6			2	4	6	5
																		3	4	8	5	14	18			3	4	8	5	14	18							2	2	4	7	7	8			2	2	4	7
																		2	5	7	0	6	12			2	5	7		6	12							2	2	6	10	10	12			2	2	6	10
																		4	3	4	1	0	1			4	3	4	1		1							3	4	6	4	11	11			3	4	6	4
																		1	4	0	0	0	0			1	4											3	4	3	1	11	19			3	4	3	1
																		4	6			4				4	6			4
																		1	3		7	16				1	3		7	16
																		3	5		14	15				3	5		14	15
																		4	4		13	16				4	4		13	16
																		3	4		5	7				3	4		5	7
																		4	6		0	1				4	6			1
																		2	2		0	0				2	2
																		4	7		1	0				4	7		1
																		3	2		0	0				3	2
																		-2.5
																		-2.5
																		-2.5
																		-2.5
																		-2.5
																		-2.5
																		0
																		2
																		5.5
																		9
																		12
																		15.5
																		17.5
																		21.5
																		23.5
																		2.5
																		2.5
																		2.5
																		2.5
																		2.5
																		2.5
																		0
																		2
																		5.5
																		9
																		12
																		15.5
																		17.5
																		21.5
																		23.5
[truncated: 99 more columns]

## Sheet: NL control cells
bjd0714c2
nm0224c34		NL				SUMMARY								INDIVIDUAL CELLS >		INDIVIDUAL CELLS >
nm0231c24
bjd0723c2	N=	15																300	350	400	500	500	550															250	300	300	400	350	400
szj712c3		average	sem		5	10	20	40	60	80						bjd0714c2		5	10	20	40	60	80			5	10	20	40	60	80		average			nm0224c34		5	10	20	40	60	80			5	10	20	40
bjd0730c2f	Rin	167.531	13.904													Rin	133.62																			Rin	232.281	0	0	0	0	0	0
nm0269c31	Mtau	22.4309	1.10571									VAR	0.600462	0.0758653		Mtau	12.45								VAR	0.231429	0.336257	0.252941	0.174524	0.116162	0.298698		0.235002			Mtau	23.61								VAR	0.758893	0.490526	0.797076	0.486928
nm297c35	max AP	58.6667	3.48694	current	average firing frequency											max AP	64																			max AP	66
bjd794c1c				50	0	0	0	0	0	0								0	0	0	0	0	0															0	0	0	0	0	0
nm309c34	RMP	-84.4589	1.25816	100	0.2	0.266667	0.321429	0.178571	0	0.2		ASL	1.48662	0.081015		RMP	-85.3237	0	0	0	0	0	0		ASL	1.14998	1.21498	1.11803	0.969765	1.24796	1.09707		1.13296			RMP	-92.0457	0	0	0	0	0	0		ASL	2.06107	1.83412	1.77709	1.38789
bjd774c2e	tested MP	-82.52	4.17234	150	0.966667	0.933333	1.14286	1.71429	1.19231	1.53333						tested MP		0	0	0	0	0	0													tested MP	-89.986	0	0	0	0	0	0
nm305c25				200	2.93333	3.4	3	3.5	3.80769	4.2								0	0	0	0	0	0															1	0	0	0	0	0
nm310c21	Rin VC	176.07	17.1854	250	6.16667	6.46667	6.75	5.82143	9.65385	7.9		OFFSET	155.13	10.2117		Rin VC	173.107	1	0	0	0	0	0		OFFSET	200.622	196.819	189.148	198.818	179.652	183.904		191.494			Rin VC	276.582	6	2	1.5	0	5.5	4.5		OFFSET	167.185	168.702	141.861	159.054
bjd724c2				300	9.9	11.9	12.0357	12.6071	17.5769	13.9667								4	3	1	0	0	0.5															10.5	7	10.5	5	18	15.5
nm305c21	very first AP			350	13.8667	17.8	18.1429	21	26.9615	23.0333						very first AP		7	8.5	7	4.5	9	8.5													very first AP		15.5	13	19.5	14	33	31
	max dv/dt (no filter)	775.337	32.5016	400	18.2	22.2333	25.2857	29.0357	35.4231	34.3333						max dv/dt (no filter)	700	10	11	14	11.5	16.5	15.5													max dv/dt (no filter)	735.89	21	20.5	29	27.5	44.5	49
	threshold	-37.8753	0.486826	450	21.4	27.6	32.2143	34.7143	44.7308	45.4667						threshold	-39.609	12	16	17.5	17	25	26													threshold	-40.254	25	25	43	37	53	64
	AP width	0.515533	0.0110306	500	24.7333	31.6	37.1429	40.1786	50.3846	55.2667						AP width	0.47	15	19	24	24.5	35	36													AP width	0.466	28.5	32	48	39	58.5	77.5
				550	28.3333	36.0667	42.8929	46.2143	54.6923	64.5								17	21.5	29	33	48.5	49.5														0.282	36	37	55	44	59.5	79
				600	31.7	40.6	49.0714	52.9286	58.1154	70.5								20	26	33.5	38.5	58	64.5														0.621	39.5	44	65	53	59.5	79
				650	34.5333	44	51.6429	59.0714	60.1923	76.2								22	30	36.5	39.5	59	76.5															44	48	68.5	66.5	64	79.5
				700	38.0333	46.6667	54.3929	64.0357	62.2308	79.2								25.5	33	42.5	43	60	79															50.5	55.5	72	77.5	70.5	79.5
				750	39.8333	49.3333	58.0357	66.4643	63.7692	80.1								27	36.5	45.5	46.5	60	80															53	58	75.5	79.5	76.5	80
												current						5	10	20	40	60	80			5	10	20	40	60	80							5	10	20	40	60	80			5	10	20	40
												50		spike count				0	0	0	0	0	0		50	x	x	x	x	x	x							0	0	0	0	0	0		50	x	x	x	x
												100						0	0	0	0	0	0		100	x	x	x	x	x	x							0	0	0	0	0	0		100	x	x	x	x
												150						0	0	0	0	0	0		150	x	x	x	x	x	x						-91.4189	0	0	0	0	0	0		150	x	x	x	x
												200						0	0	0	0	0	0		200	x	x	x	x	x	x							0	0	0	0	0	0		200	x	x	x	x
												250						0	0	0	0	0	0		250	x	x	x	x	x	x							4	4	3	0	1	3		250	4	4	3	x
												300						4	1	0	0	0	1		300	4	1	x	x	x	1							9	9	10	10	10	13		300	9	9	10	10
												350						6	8	5	3	9	11		350	6	8	5	3	9	11							13	17	19	19	20	21		350	13	17	19	19
												400						9	9	10	9	17	17		400	9	9	10	9	17	17							16	23	26	32	32	32		400	16	23	26	32
												450						10	14	15	15	27	29		450	10	14	15	15	27	29							20	27	37	38	48	52		450	20	27	37	38
												500						14	19	19	19	37	41		500	14	19	19	19	37	41							24	36	39	39	58	76		500	24	36	39	39
												550						15	19	22	28	52	56		550	15	19	22	28	52	56							30	39	50	48	59	79		550	30	39	50	48
												600						19	23	28	37	58	73		600	19	23	28	37	58	73							34	48	58	58	59	79		600	34	48	58	58
												650						20	29	33	39	59	78		650	20	29	33	39		78							39	49	59	69	59	79		650	39	49	59	69
												700						24	30	39	40	60	79		700	24	30	39										43	58	65	79	60	79		700	43	58	65
												750						25	34	40	40	60	80		750	25	34											46	58	73	80	62	80		750	46	58
												current						5	10	20	40	60	80			5	10	20	40	60	80							5	10	20	40	60	80			5	10	20	40
												50						0	0	0	0	0	0			x	x	x	x	x	x							0	0	0	0	0	0			x	x	x	x
												100						0	0	0	0	0	0			x	x	x	x	x	x							0	0	0	0	0	0			x	x	x	x
												150						0	0	0	0	0	0			x	x	x	x	x	x						-88.553	0	0	0	0	0	0			x	x	x	x
												200						0	0	0	0	0	0			x	x	x	x	x	x							2	0	0	0	0	0			2	x	x	x
												250						2	0	0	0	0	0			2	x	x	x	x	x							8	0	0	0	10	6			8	x	x	x
												300						4	5	2	0	0	0			4	5	2	x	x	x							12	5	11	0	26	18			12	5	11	x
												350						8	9	9	6	9	6			8	9	9	6	9	6							18	9	20	9	46	41			18	9	20	9
												400						11	13	18	14	16	14			11	13	18	14	16	14							26	18	32	23	57	66			26	18	32	23
												450						14	18	20	19	23	23			14	18	20	19	23	23							30	23	49	36	58	76			30	23	49	36
												500						16	19	29	30	33	31			16	19	29	30	33	31							33	28	57	39	59	79			33	28	57	39
												550						19	24	36	38	45	43			19	24	36	38	45	43							42	35	60	40	60	79			42	35	60	40
												600						21	29	39	40	58	56			21	29	39	40	58	56							45	40	72	48	60	79			45	40	72	48
												650						24	31	40	40	59	75			24	31	40	40		75							49	47	78	64	69	80			49	47	78	64
												700						27	36	46	46	60	79			27	36	46	46		79							58	53	79	76	81	80			58	53	79	76
												750						29	39	51	53	60	80			29	39	51	53									60	58	78	79	91	80			60	58	78	79
														1st derivative of spike count
																																														4	4	3
																										4	1				1															5	5	7	10
																										2	7	5	3	9	10															4	8	9	9
																										3	1	5	6	8	6															3	6	7	13
																										1	5	5	6	10	12															4	4	11	6
																										4	5	4	4	10	12															4	9	2	1
																										1		3	9	15	15															6	3	11	9
																										4	4	6	9	6	17															4	9	8	10
																										1	6	5	2		5															5	1	1	11
																										4	1	6																		4	9	6	10
																										1	4																			3		8
																																														2
																										2																				6
																										2	5	2																		4	5	11
																										4	4	7	6	9	6															6	4	9	9
																										3	4	9	8	7	8															8	9	12	14
																										3	5	2	5	7	9															4	5	17	13
																										2	1	9	11	10	8															3	5	8	3
																										3	5	7	8	12	12															9	7	3	1
																										2	5	3	2	13	13															3	5	12	8
																										3	2	1			19															4	7	6	16
																										3	5	6	6		4															9	6		12
																										2	3	5	7																	2	5		3
[truncated: 203 more columns]

## Sheet: dpi14
bjd715c2c		Note: this population is not used for detailed analyses because the ABGCs lack full action potentials at this age - see dV/dt, maxAP, threshold.
bjd714c2c		dpi14				SUMMARY										INDIVIDUAL CELLS >
bjd0715c2b
nm0224c32	N=	7																#REF!	#REF!	#REF!	#REF!	#REF!	#REF!															#REF!	#REF!	#REF!	#REF!	#REF!	#REF!
nm0224c33		average	sem		5	10	20	40	60	80						bjd715c2c		5	10	20	40	60	80			5	10	20	40	60	80		average			bjd714c2c		5	10	20	40	60	80			5	10	20	40
bjd0716c2b	Rin	1198.05	162.504													Rin	781.026																			Rin	1383.63
bjd0716c2a	Mtau	33.2257	5.1234									VAR	#DIV/0!	#DIV/0!		Mtau	23.79								VAR	#DIV/0!	#DIV/0!	#DIV/0!	#DIV/0!	#DIV/0!	#DIV/0!		#DIV/0!			Mtau	36.03								VAR	#DIV/0!	#DIV/0!	#DIV/0!	#DIV/0!
0	max AP	0.714286	0.285714	current	average firing frequency											max AP	2																			max AP	1
0				50	0	1.28571	0.142857	0	0	0.166667								0	6	1	0	0	1															0	0	0	0	0	0
	RMP	-51.2084	3.03769	100	0.285714	2.71429	1.42857	1.71429	0.285714	0.166667		ASL	#DIV/0!	#DIV/0!		RMP	-57.2023	2	10	6	10	1	1		ASL	#DIV/0!	#DIV/0!	#DIV/0!	#DIV/0!	#DIV/0!	#DIV/0!		#DIV/0!			RMP	-56.7428	0	0	0	0	0	0		ASL	#DIV/0!	#DIV/0!	#DIV/0!	#DIV/0!
	tested MP	-46.3823	2.02061	150	0.142857	2.71429	3.28571	1.5	0.571429	0.75						tested MP	-51.1991	1	10	5	2	1	4													tested MP	-41.9328	0	0	0	0.5	0.5	0
				200	0.142857	2.71429	3.57143	1.78571	0.428571	1.08333								1	9	5	2	1	6															0	0	0	0.5	0.5	0
	Rin VC	1292.57	157.376	250	0.285714	2.85714	3.85714	3.07143	0.642857	1.75		OFFSET	#REF!	#REF!		Rin VC	968.863	2	10	6	5	2	10		OFFSET	#REF!	#REF!	#REF!	#REF!	#REF!	#REF!		#REF!			Rin VC	1269.84	0	0	0	0.5	0.5	0		OFFSET	#REF!	#REF!	#REF!	#REF!
				300	0.571429	2.85714	6	2.92857	0.642857	2.83333								4	10	20	3	1	16															0	0	0	0.5	0.5	0
	very first AP			350	0.571429	2.85714	4.85714	6.07143	1.5	4.58333						very first AP		4	10	10	17	7	26													very first AP		0	0	0	0.5	0.5	0.5
	max dv/dt (no filter)	34.3029	8.72344	400	0.571429	2.85714	7.14286	9.14286	1.64286	4.5						max dv/dt (no filter)	74.695	4	10	20	33	8	25													max dv/dt (no filter)	42.073	0	0	0	0.5	0.5	0.5
	threshold	-22.7587	3.49145	450	0.714286	2.85714	5.57143	9.85714	3.92857	6						threshold	-26.648	5	10	18	33	23	34													threshold	-30.465	0	0	0	0.5	0.5	0.5
	AP width	1.29	0.153268	500	0.714286	2.85714	5.71429	7.64286	5.35714	7.5						AP width	1.164	5	10	19	24	30	43													AP width	1.441	0	0	0	0.5	0.5	0.5
				550	0.714286	2.92857	5.64286	10.0714	6.35714	8.83333							0.93	5	10	19	28	38	49															0	0	0	0.5	0.5	1
				600	0.714286	2.92857	5.78571	10.6429	9.21429	9.66667								5	10	20	32	47	55															0	0	0	0.5	0.5	1
				650	0.714286	2.85714	5.64286	11.1429	10.7143	9.33333								5	10	19	36	53	52															0	0	0	0.5	1	1
				700	0.714286	2.85714	5.78571	13.6429	12.7143	10.5								5	10	20	39	60	57															0	0	0	0.5	2	1
				750	0.714286	2.85714	5.57143	12.0714	12.8571	11.9167								5	10	18	39	60	64															0	0	0	1.5	2	1
												current						5	10	20	40	60	80			5	10	20	40	60	80							5	10	20	40	60	80			5	10	20	40
												50		spike count				0	6	1	0	0	1		50	x	6	1	x	x	1							0	0	0	0	0	0		50	x	x	x	x
												100						2	10	6	10	1	1		100	2	10	6	10	1	1							0	0	0	0	0	0		100	x	x	x	x
												150					-51.1991	1	10	5	2	1	4		150	1	10	5	2	1	4						-44.0334	0	0	0	1	1	0		150	x	x	x	1
												200						1	9	5	2	1	6		200	1	9	5	2	1	6							0	0	0	1	1	0		200	x	x	x	1
												250						2	10	6	5	2	10		250	2	10	6	5	2	10							0	0	0	1	1	0		250	x	x	x	1
												300						4	10	20	3	1	16		300	4	10	20	3	1	16							0	0	0	1	1	0		300	x	x	x	1
												350						4	10	10	17	7	26		350	4	10	10	17	7	26							0	0	0	1	1	1		350	x	x	x	1
												400						4	10	20	33	8	25		400	4	10	20	33	8	25							0	0	0	1	1	1		400	x	x	x	1
												450						5	10	18	33	23	34		450	5	10	18	33	23	34							0	0	0	1	1	1		450	x	x	x	1
												500						5	10	19	24	30	43		500	5	10	19	24	30	43							0	0	0	1	1	1		500	x	x	x	1
												550						5	10	19	28	38	49		550	5	10	19	28	38	49							0	0	0	1	1	1		550	x	x	x	1
												600						5	10	20	32	47	55		600	5	10	20	32	47	55							0	0	0	1	1	1		600	x	x	x	1
												650						5	10	19	36	53	52		650	5	10	19	36	53	52							0	0	0	1	1	1		650	x	x	x	1
												700						5	10	20	39	60	57		700	5	10	20	39	60	57							0	0	0	1	3	1		700	x	x	x
												750						5	10	18	39	60	64		750	5	10	18	39	60	64							0	0	0	3	3	1		750	x	x
												current						5	10	20	40	60	80			5	10	20	40	60	80							5	10	20	40	60	80			5	10	20	40
												50														x	x	x	x	x	x							0	0	0	0	0	0			x	x	x	x
												100														x	x	x	x	x	x							0	0	0	0	0	0			x	x	x	x
												150														x	x	x	x	x	x						-39.8322	0	0	0	0	0	0			x	x	x	x
												200														x	x	x	x	x	x							0	0	0	0	0	0			x	x	x	x
												250														x	x	x	x	x	x							0	0	0	0	0	0			x	x	x	x
												300														x	x	x	x	x	x							0	0	0	0	0	0			x	x	x	x
												350														x	x	x	x	x	x							0	0	0	0	0	0			x	x	x	x
												400														x	x	x	x	x	x							0	0	0	0	0	0			x	x	x	x
												450														x	x	x	x	x	x							0	0	0	0	0	0			x	x	x	x
												500														x	x	x	x	x	x							0	0	0	0	0	0			x	x	x	x
												550														x	x	x	x	x	x							0	0	0	0	0	1			x	x	x	x
												600														x	x	x	x	x	x							0	0	0	0	0	1			x	x	x	x
												650														x	x	x	x	x	x							0	0	0	0	1	1			x	x	x	x
												700														x	x	x	x	x	x							0	0	0	0	1	1			x	x	x	x
												750														x	x	x	x	x	x							0	0	0	0	1	1			x	x	x	x
														1st derivative of spike count
[truncated: 100 more columns]
